# Supplementary material for: Narrowing streamflow distribution can alter water allocation timing and quantity
Source: Research Square preprint supplement (doi:10.21203/rs.3.rs-7236227/v1), 2025-08-13
Supplement: Supplementary file 1 [file 1f67d41f7c03fb49c99851f6.pdf]

1 **Supplemental material for “Narrowing streamflow distribution can alter water allocation timing**  
2 **and quantity”**

3  
4 **Materials and Methods**

5 *Streamflow data*

6 Daily stream discharge data was obtained from the United States Geological Survey (USGS) for basins  
7 included in the Geospatial Attributes of Gages for Evaluating Streamflow, version II (GAGES II)  
8 dataset<sup>1</sup>. These 9,322 stream gauges were selected as those with at least 20 years of continuous data or  
9 those that were active as of 2009. From this dataset, 2,057 gauges are classified as “reference” gauges -  
10 those with a minimal amount of disturbance. We calculated streamflow statistics only on reference gauge-  
11 years with at least 90% of data not missing. We assume that reported zero values are true zeros and not  
12 missing values. Stream gauges have a mean of 47 ( $\pm$  25 standard deviation) years of data.

13 This dataset is published with station locations and associated watersheds draining to each station.  
14

15 We also calculated trends in Q, CT, and SDoT on non-reference gauges to evaluate the impact of the  
16 choice to select reference gauges only (Figures S10-12). Results suggested that the presence of non-  
17 reference gauges confounded the signal, so we retained reference gauges only for all other analyses.  
18

19 Separately, for the Rio Grande case study, we secured daily flow records for the Del Norte gauge (USGS  
20 0822000) on Rio Grande from the USGS National Water Information System. While not a reference  
21 gauge in the main data set, it is the gauge that is utilized to set priority cutoffs along the Rio Grande in  
22 Colorado.  
23

24 *Climate data*

25 Several gridded climate products are available and could be used to evaluate streamflow sensitivity to  
26 climate; here, we use the NClimGrid product because of its long period of record, with monthly climate  
27 data dating back to 1895<sup>2</sup>. We use the 4-km monthly gridded average air temperature and precipitation.  
28 We sum water year (Oct 1 - Sept 30) precipitation and average water year temperature over each grid cell.  
29 For each gauge in the reference GAGES II dataset, we then sum total water year precipitation and average  
30 water year temperature over the contributing watershed area to obtain estimates of major climate variables  
31 contributing to streamflow quantity and timing at each location.  
32

33 *Water right and diversion data*

34 Because states, not the federal government, are generally vested with water rights jurisdiction, associated  
35 data is compartmentalized and of varying quality across states. To gain insights into general patterns of  
36 appropriate water rights, we accessed water right allocation data for the 17 western states from the  
37 Western States Water Data Access and Analysis Tool (WestDAAT) created by the Water Data Exchange  
38 (WaDE)<sup>3</sup>, which has attempted to harmonize data sources across states, although coverage is not uniform.  
39 For instance, not all water rights have allocation amounts, including all the Texas data, leaving us to  
40 exclude that state, reducing our sample to 16 states. We keep only rights for surface water, coding them to  
41 be “flow” based if allocation flow is greater than zero, “volume” based if allocation volume is greater  
42 than zero, and “flow and volume” if both are greater than zero. We also code those with beginning dates  
43 of January 1 and ending dates of December 31 to not have timing restrictions. In total, we have 361,555  
44 water right records, or 22,597 records per state on average. The range across states is wide, spanning from

1 88,434 in Montana to 1,538 in North Dakota. We summarize the distribution of water right allocations  
2 (flow, volume, or both) in Figure S19.

3  
4 Water rights in Colorado are available from Colorado’s Department of Water Resources, which we  
5 accessed from the Colorado Information Marketplace<sup>4</sup>. Matched to WDIDs (water district identification  
6 number), we limited these data to ditches or ditch systems that list the Rio Grande as its water source.  
7 These data provide appropriation date and quantity for each water right. Because ditches often acquire  
8 more than one right to diversify across priority, we create a flow-weighted average of the ditches’ water  
9 rights before ranking them to arrive at a priority order.

10  
11 We accessed monthly diversion records by WDID from the Colorado Department of Water Resources’  
12 HydroBase platform along the Rio Grande (Division 3) from water year 1950-2024. From these we  
13 construct water year total diversions. The data includes zeros as well as missing data for some ditches.  
14 We assume that missing data are likely truly missing, rather than zero, and so we treat them as such for  
15 our main analysis. However, missing data disproportionately appear for lower priority ditches and so we  
16 also conduct robustness checks where some or all of the missing data are treated as zeros instead.

### 17 *Streamflow statistics*

18 We focus on our calculations of total annual streamflow (Q), center of timing (CT), standard deviation of  
19 timing (SDoT) for each gauge, the Gini index, and Apportionment Entropy (AE), but also calculate a  
20 standard suite of streamflow metrics to further assess correlations of SDoT with other metrics.

21  
22  
23 Q is calculated by summing daily values, assuming the value reported for each day represents a daily  
24 average streamflow for that gauge.

25  
26 CT is calculated as the weighted mean of days of the water year, with weights based on daily Q, as  
27 follows:

$$28 \quad CT = \frac{\sum(t_i q_i)}{\sum q_i}, \quad (S1)$$

29  
30  
31 where  $t_i$  is the day of water year since October 1 and  $q_i$  is the flow on that day (Stewart et al., 2004; 2005).

32  
33 In a new extension of the CT concept, we calculate SDoT as the weighted standard deviation of daily  
34 streamflow, where the standard deviation of days was weighted by the daily streamflow value:

$$35 \quad SDoT = \sqrt{\frac{\sum q_i (t_i - CT)^2}{(N' - 1) \sum q_i}}, \quad (S2)$$

36  
37 where CT is defined as in equation S1 and  $N'$  is the number of non-zero observations each year. As flows  
38 become more concentrated around the CT, SDoT approaches zero but is undefined if the flow occurred  
39 entirely on one day. A uniform flow would equate to an SDoT of 105.5. SDoT will further increase if the  
40 hydrograph takes on a “convex” shape (low flows in the middle with higher flows at each end), hitting a  
41 maximum of 183 if the flows were split evenly between the first and last day of the year. Because SDoT

1 results do depend on timing, they will be different if calculated using a different water year definition,  
 2 such as a local water year <sup>5</sup>, but the water year definition used here is widely accepted <sup>6,7</sup> and maintains  
 3 consistency among gauges.

4  
 5 Alternative measures of inequality and “seasonality” in the literature include the Gini index and AE. The  
 6 Gini index captures the “inequality” of water flows across the days of the year of streamflow distribution  
 7 (Gudmundsson et al., 2019; Masaki et al., 2014). First developed for economic contexts by Corrado Gini  
 8 in 1912 <sup>8</sup>, the Gini index calculates the ratio of the area between the Lorenz Curve - the cumulative sum  
 9 of the normalized resource under consideration on the y-axis having ordered the normalized “owner”  
 10 population from the smallest share to the largest on the x-axis - and the curve of a perfectly equitably  
 11 distribution line (45 degree line) relative to the entire area under the equal distribution line. In a discrete  
 12 setting where the days have been sorted from lowest discharge to highest ( $q_1 \leq q_2 \leq \dots \leq q_{365}$ ), the formula  
 13 is:

$$14 \quad Gini = \frac{1}{N} (N + 1 - 2 \left( \frac{\sum (N+1-i)q_i}{\sum q_i} \right)). \quad (S3)$$

15 Zero indicates perfect equality and one indicates extreme inequality with the top percentile commanding  
 16 100 percent of the resource. As seen by its construction, specifically the reordering of the days, the Gini  
 17 index only captures inequality but is completely insensitive to timing; it does not consider *when* the larger  
 18 or smaller flow days occur within the year whereas SDoT is sensitive to both the different amounts of  
 19 discharge and when they occur.

20  
 21 AE measures variability, or randomness, of amounts across different groups. In hydrology this has been  
 22 utilized to describe variability, described as seasonality, of precipitation occurring across months  
 23 (Maruyama et al. 2005; Mishra et al. 2009; Feng et al. 2013) and more recently adopted for a similar  
 24 purpose in streamflow seasonality (Wang et al. 2024). Defining  $r_1, r_2, \dots,$  and  $r_{12}$  as the total discharge in  
 25 each of the 12 months, and R as the total annual discharge, AE is defined as:

$$26 \quad AE = - \sum \left( \frac{r_i}{R} \right) \log_2 \left( \frac{r_i}{R} \right). \quad (S4)$$

27  
 28 It is inversely related to the Gini in that streamflow entirely concentrated in one month would result in a  
 29 value of zero and then increase with more equal distributions until  $\log_2(12)$  (about 3.58). This takes a step  
 30 towards considering the concentration of the temporal relationship of low and high flows days to the  
 31 extent they are lumped within calendar months. However, it still ignores whether the low flow or high  
 32 flow months themselves are adjacent to one another in the year, and whether daily flows within months  
 33 are uneven or clustered. For instance, should all the streamflow occur in a 30-day period and that happens  
 34 to fall within a single calendar month, then AE will be zero, whether or not the flow occurs entirely on  
 35 one day, evenly across those thirty days, or any other combination within that month. If the flow is spread  
 36 over all 30 days, but those days are split across two adjacent months, the AE would be equal to 0.08.  
 37 Furthermore, if the 30 days were split between any two months, not just adjacent months, the value would  
 38 still be 0.08. SDoT, in comparison, treats the consecutive 30 days the same no matter the calendar months  
 39 while being sensitive to if they are more separated in time.

40  
 41  
 42 In addition to possible relationships with the Gini index and AE, we also calculate a standardized set of  
 43 streamflow metrics <sup>9</sup> to ensure that SDoT is not duplicative with other well-established metrics.

1 Gudmundsson et al. (2019) define CT as the day at which 50% of flow has passed the stream gauge, as in  
2 Regonda et al. (2005), Hidalgo et al. (2009), and others, rather than the flow-weighted average day of  
3 water year as in Stewart et al. (2004; 2005). We use the weighted average definition of CT throughout the  
4 manuscript but present both definitions here. On the whole, SDoT shows very little correlation except  
5 with the alternative measures of variability (Figure S5).

6  
7 SDoT's highest correlation is with AE (Pearson's  $r = 0.72$ ), followed by the Gini index (Pearson's  $r = -$   
8  $0.63$ ), and it was somewhat correlated with the coefficient of variation (CV) ( $r = -0.36$ ). SDoT is  
9 relatively uncorrelated with other statistics, though it tends to be slightly higher when low flows are  
10 higher. Notably, Gini, AE, and CV are generally more correlated with one another than with SDoT, with a  
11 particularly high correlation between AE and Gini ( $r = -0.82$ ). The stronger correlations of SDoT with  
12 AE and the Gini index emerges due to a bounded relationship with SDoT reflecting that they all do  
13 capture disparate flows across days in different ways; for a given AE (Gini) value there is a maximum  
14 (minimum) SDoT value and vice-versa. With Gini, it is a linear bound whereas AE is curved due to the  
15 log function (Figure S6). Beyond this limit, the SDoT can be larger when the higher flow days are more  
16 spread out around the CT.

#### 17 *Trend analysis*

18 We calculate a Sen's slope<sup>10</sup> for Q, CT, SDoT, Gini index, and AE at each gauge with at least 40 years of  
19 data in water years 1960-2023 and observations extending to 2023, based on observations that the number  
20 of new gauges began to plateau around 1960 (Figure S4). This results in analysis on 803 gauges. While  
21 SDoT is the focus of the present manuscript, we compare results against widely recognized metrics (Q,  
22 CT, and other inequality/seasonality) to provide additional context for the frequency and size of  
23 significant trends. Trends with Sen's slope p-value  $< 0.05$  are denoted as locally significant. Field  
24 significance is evaluated using Monte Carlo methods as described in Livezey & Chen<sup>11</sup>. Specifically, we  
25 resample all water years between 1960-2023  $N = 1000$  times without replacement. We calculate Sen's  
26 slopes for all gauges in each sample and record the fraction of gauges with locally significant trends ( $p <$   
27  $0.05$ ). For each variable, we then develop an empirical cumulative distribution function (ECDF) of the  
28 fraction of statistically significant gauges in each sample and compare the fraction of significant gauges  
29 from the true time series with the ECDF to estimate the probability of randomly observing at least as  
30 many gauges with statistically significant trends as in the true time series. When the true fraction is  
31 outside the sampled range, we report  $p < 1/N$ , or  $p < 0.001$ .

#### 32 *Climate sensitivity*

33  
34 At each gauge with at least 30 years of data ( $n = 1343$  gauges), we estimate annual Q, CT, SDoT, Gini  
35 index, and AE as a linear function of annual temperature and precipitation values at that gauge. As with  
36 the trend analysis, Q, CT, Gini index, and AE statistical relationships are calculated to provide context for  
37 the SDoT results. The slope values for temperature and precipitation, respectively, are reported to  
38 illustrate SDoT sensitivity to these climate variables at each gauge, and the p-value for each associated  
39 term is reported to illustrate the significance of SDoT dependence on interannual climate variability.

#### 40 *Water rights allocation simulation*

41 We create the stylized, illustrative streamflows by altering normal distributions (using Stata software).  
42 We first convert the day of the year to a relevant range of values centered on zero ( $\frac{day-365/2}{10}$ ) and then  
43  
44

1 extract p-values from a standard normal distribution (standard deviation equal to one) and a wider  
2 distribution (standard deviation of two) based on those centered values to stand in for a fraction of the  
3 total flow on each day. We then shift the center of timing by 60 days to align closer to snowmelt-  
4 dependent hydrographs. To avoid (near) zero discharge days, we then add 0.0025 to all flows before  
5 recalculating the share of water discharged each day of the water year so that all years add up to a  
6 normalized total discharge value of one.

7  
8 To simulate the senior/junior water user allocations, we set the senior’s water right, arbitrarily, to be 0.01  
9 units of flow. Using this threshold, we allocate the first 0.01 units of water to the seniors each day, letting  
10 the remainder, when present, accrue to the junior water user. Under the hydrograph created by the  
11 standard normal distribution, this amounts to 76 percent of the total flow over the year going to the senior  
12 water user. The specific values are of course sensitive to the cutoff for “senior”, but the direction of the  
13 results are not. In practice, although “senior” and “junior” are discussed as if binary groups, it is a  
14 continuum of seniority and changing SDoT will potentially impact users differentially along the spectrum  
15 depending on the specifics.

#### 16 *Rio Grande water diversion analysis*

17  
18 To analyze the heterogeneous relationship between SDoT and annual water diversions across different  
19 levels of priority seniority, we combine the annual water year hydrograph characteristics (SDoT, Q, and  
20 CT) with the panel data of annual diversions by irrigation ditch each year. The panel spans 72 years from  
21 the water year 1951 to 2023. There are 83 distinct ditches leading to 6,059 total observations. However,  
22 as discussed in the data, a number of diversion records are missing (1,704, or 28%). The missing records  
23 are disproportionately in the lowest quartile of priority (those most junior) where 50 percent are missing  
24 (Figure S19). While there are recorded zeros, it amounts to just 1.1 percent of the annual records.

25 Accordingly, we are suspicious that this signals an undercount of actual zeros. In the end, we treat the  
26 missing as missing for the main analysis, but conduct robustness checks with the extreme case that the  
27 missing values are all zeros as well as a more conservative middle ground where we replace the missing  
28 observation with a zero only after we observe a first non-missing diversion for that WDID and we stop  
29 replacing the missing data after the last non-missing is observed, conditional on that occurring prior to  
30 2016. This replaces 311 records of missing diversions with zero.

31  
32 To provide tractability to the empirical model, we bin the 83 ditches into quartiles based on their quantity-  
33 weighted priority date averages. The breakdown of the ditches and their priorities are shown in Figure  
34 S18. The earliest claims occurred in 1866. The most junior group does have initial claims dating back to  
35 1874, but once weighted by volume consist of 1907 claims and later.

36  
37 For regression analysis, we run a fixed effect model to predict how annual stream characteristics affect  
38 ditch diversions as follows:

$$39 \ln(q + 1)_{ipy} = \sum_{p=1}^4 \beta_p \mathbf{1}[Priority = p] \times SDoT_y + \gamma \ln(Q_y) + \pi CT_y + \mathbf{D}_i + \varepsilon_{ipy}. \quad (S4)$$

40  
41  
42 The outcome is the natural log of the annual diversion  $q$  (+1 to account for zeros) of ditch  $i$  in priority  
43 quartile  $p$  during water year  $y$ . The coefficients of interests are  $\beta_1$  through  $\beta_4$ , which estimate the percent  
44 change in diversion total for a ditch in a given priority quartile for a one day increase in SDoT. To

1 account for the other stream characteristics that covary with SDoT and are expected to alter the diversion  
2 amounts too, we include total annual discharge (logged)  $Q$  for the water year and the center of timing  $CT$   
3 or the center of mass of the hydrograph. To account for aspects of a given ditch that lends itself to more or  
4 less water on average (e.g. number, priorities, and amounts of water rights in its portfolio, place of  
5 diversion along the stream, etc.) we included a vector of ditch level fixed effects ( $\mathbf{D}$ ). We are unable to  
6 include year fixed effects since our stream metrics only vary at this level. Finally, we cluster the error  
7 terms at both the ditch level and the water year level to account for heteroskedasticity and correlation  
8 within ditches and years.

9  
10 In Table S2 we provide the estimated coefficients and standard errors. Column (1) presents those of the  
11 main model that are conveyed in Figure 5b in the main text. For the most senior quartile, a one day  
12 increase in SDoT increases total diversions by 0.024 log points. To arrive at the percent changes reported  
13 in the text, we multiply the coefficient by 10 (the effect of a 10 day increase in SDoT) and then subtract  
14 one from  $e$  raised to that number ( $1 - e^{0.24} = 0.271$ , or 27.1 percent). For the other priorities, the coefficients  
15 must first be summed. That is for the fourth quartile, the effect of a one day increase in SDoT is  $0.0240 -$   
16  $0.0715 = -0.0475$ . Then the same calculation can be made to arrive at a 38 percent reduction in diversions  
17 for the lowest priority group. The remainder of Table S2 provides results for our alternative treatments of  
18 missing diversion records and utilizing the alternative stream dispersion metrics, specifically AE and the  
19 Gini coefficient. Because these metrics are all scaled differently (Gini is also inversely correlated with  
20 other two), a direct comparison of the coefficient values is not appropriate. However, across all  
21 specifications, the qualitative result that increases in stream dispersion yields reductions in water  
22 diversions for more junior irrigators compared to senior irrigators holds.

1 Supplemental Figures, S1-S24

2

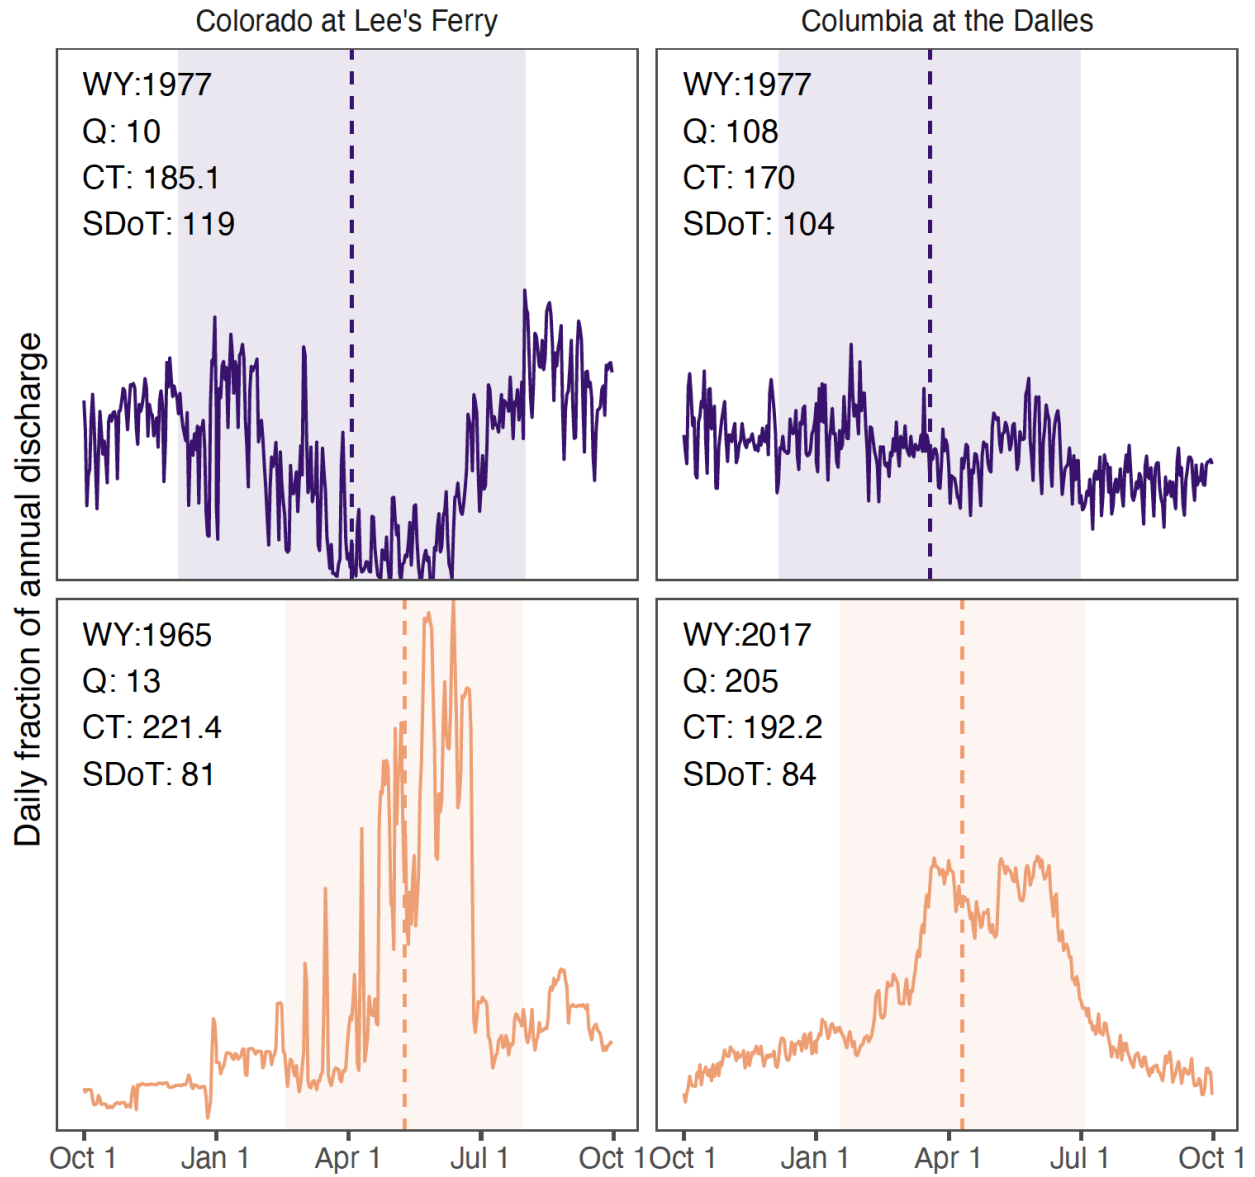

3  
4 **Figure S1.** As in Figure 1 but after major dam construction on the Colorado and Columbia.  
5  
6  
7  
8  
9  
10

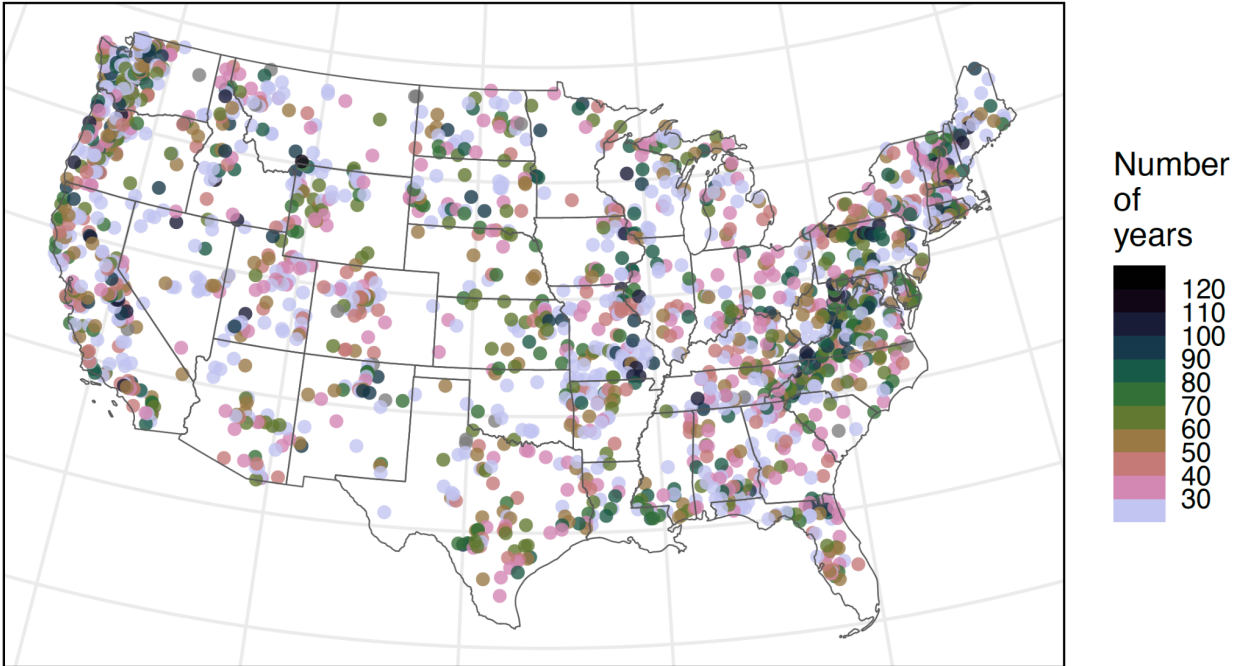

1  
2 **Figure S2.** Years of data available at each gauge. While the number of available years of data varies, we  
3 note an absence of clear spatial patterns in data completeness, supporting the use of the full period of  
4 record for analysis of interannual variability.  
5

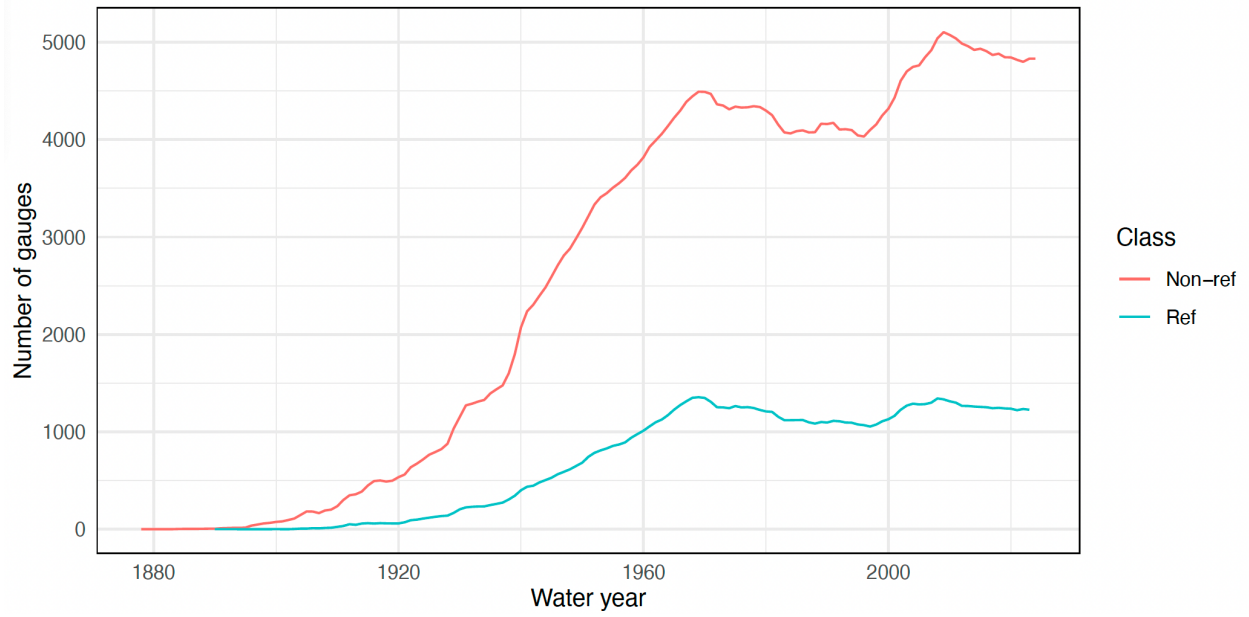

1

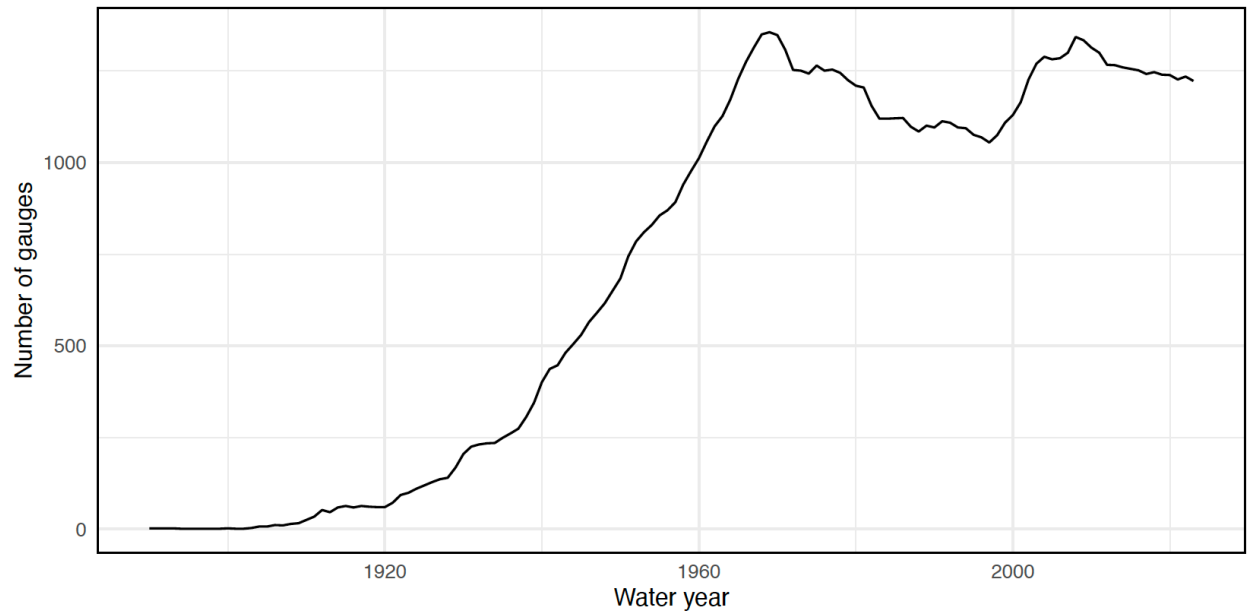

2

3

4

5

**Figure S3.** Number of streamflow gauges with at least 90% complete observations in the GAGES-II dataset.

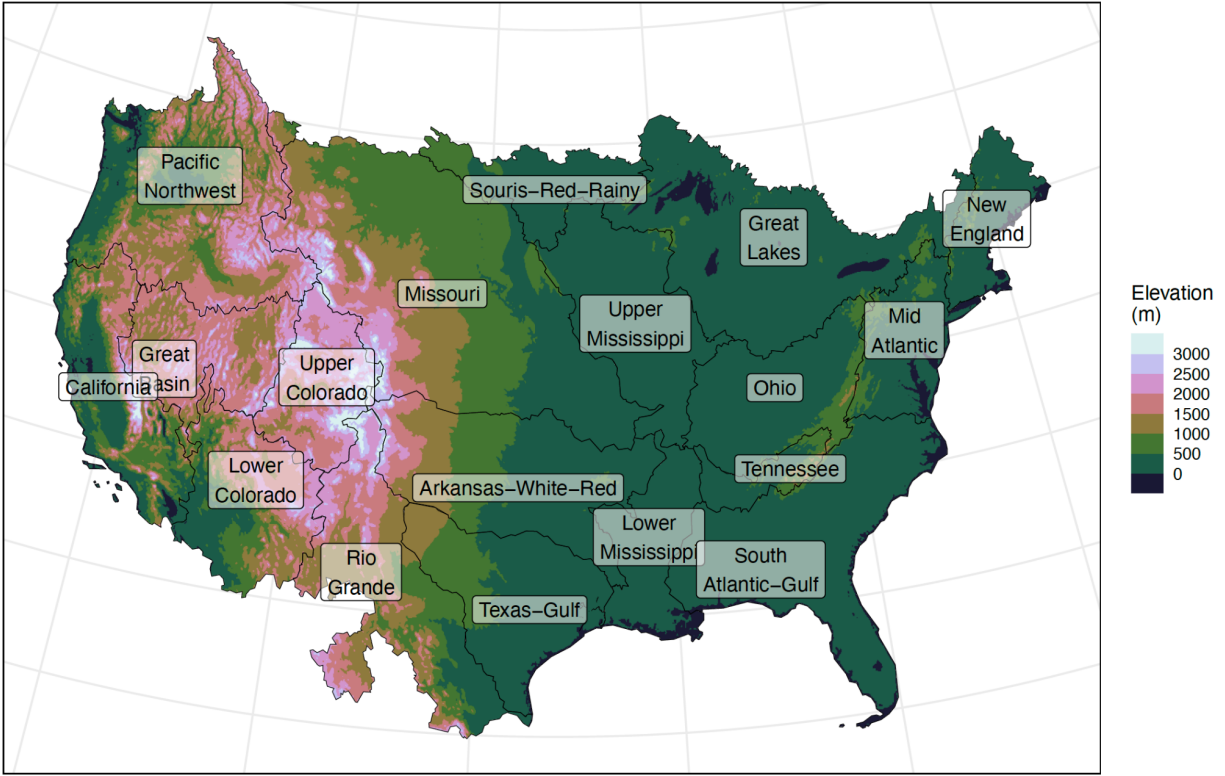

1  
 2 **Figure S4.** Map of HUC2 regions for reference to names mentioned in text.  
 3

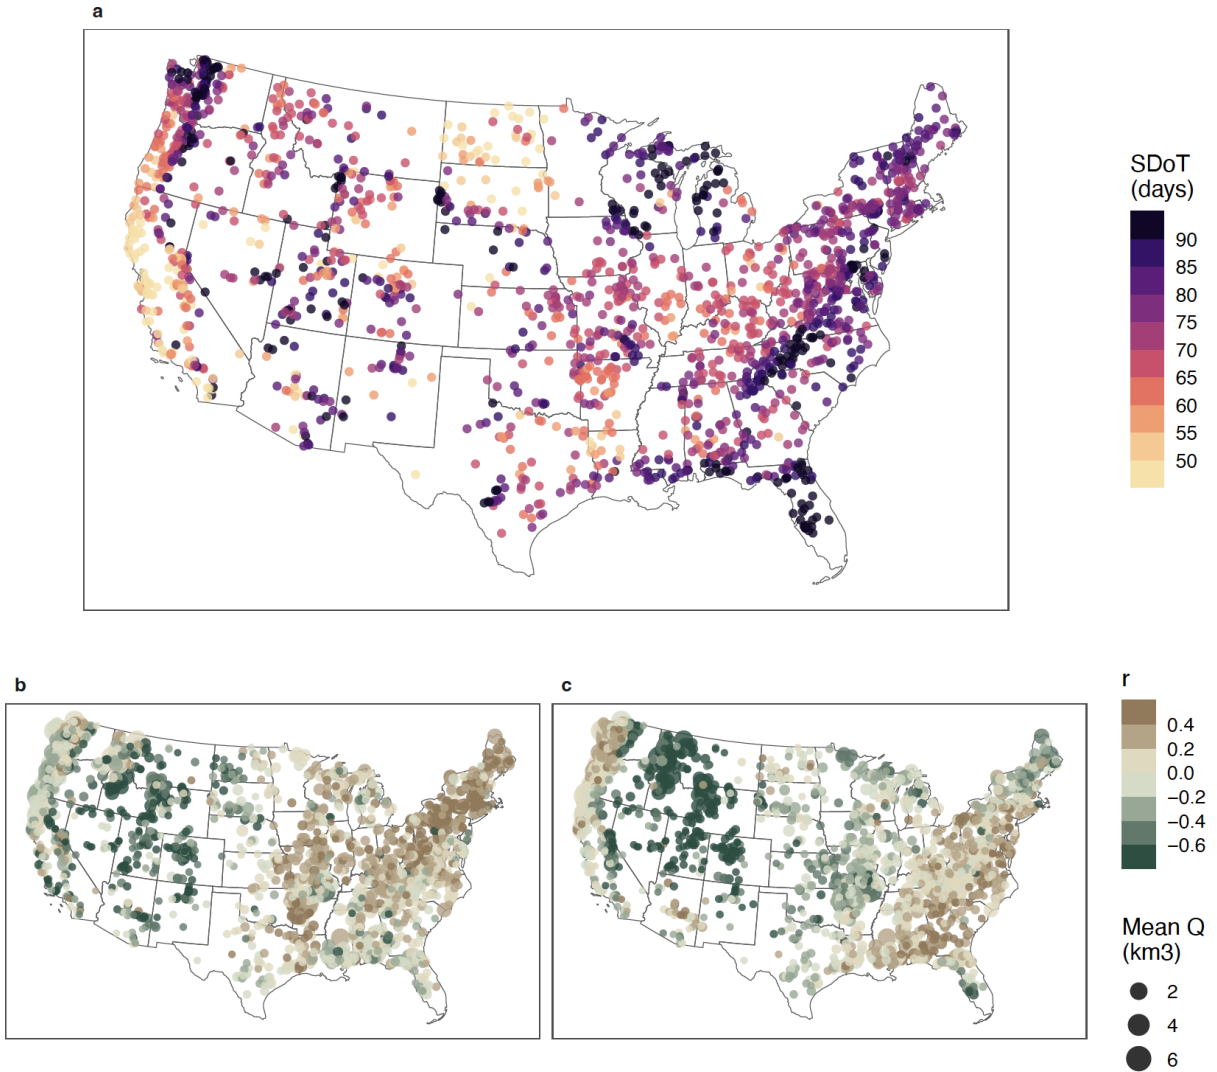

1  
2 **Figure S5. SDoT and relationship with other streamflow variables.** (a) Mean SDoT across stream  
3 gauges, and Pearson correlation coefficient ( $r$ ) among (b)  $Q$  and SDoT and (c)  $CT$  and SDoT.  
4  
5

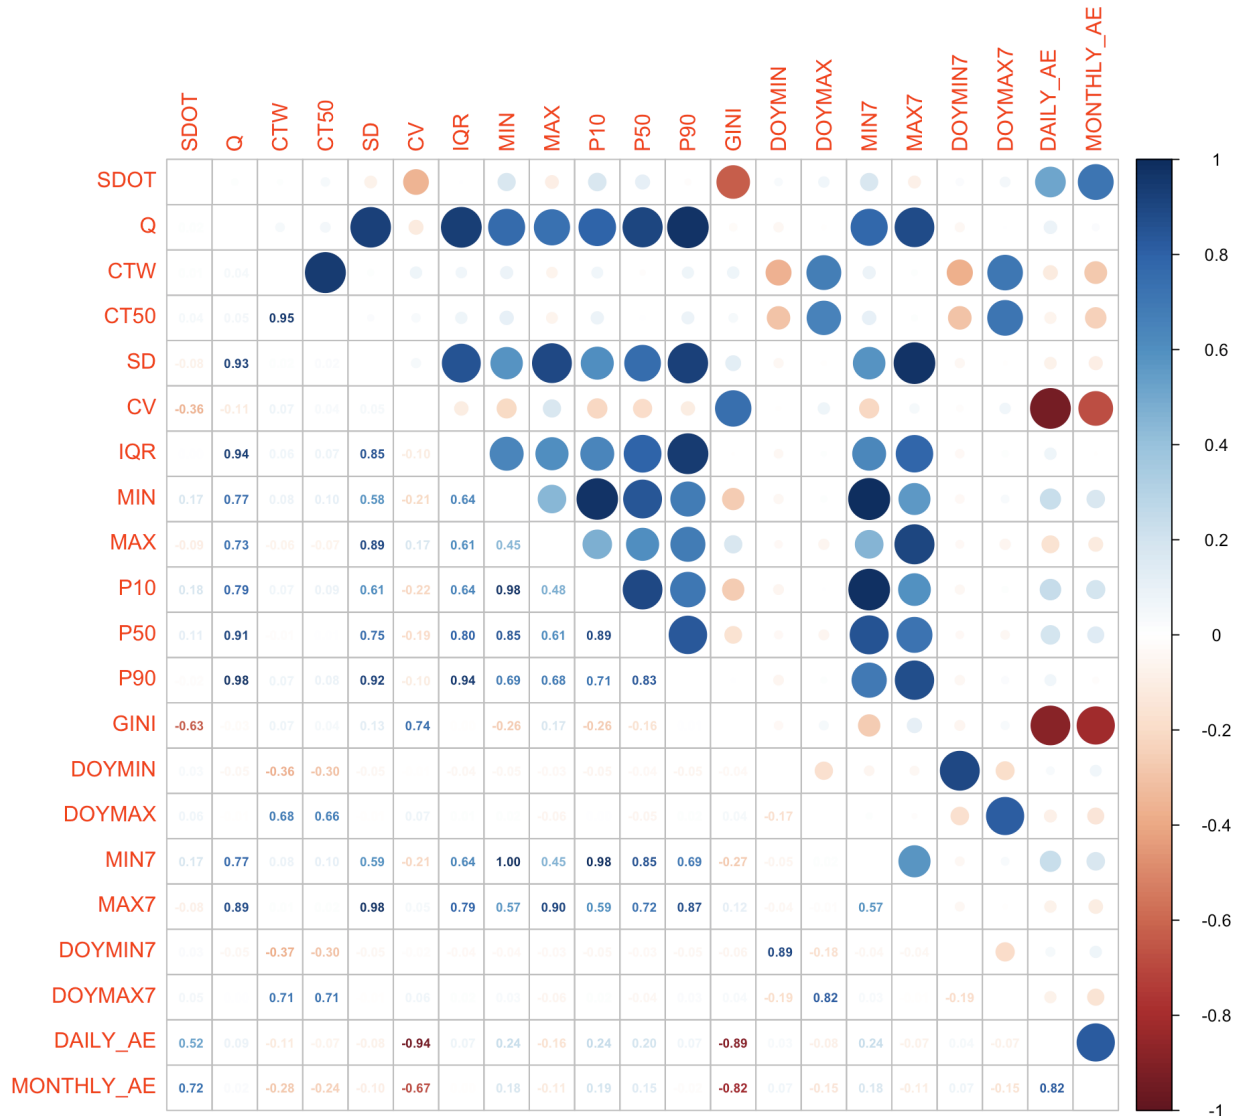

1  
2 **Figure S6.** Correlation matrix among SDoT and streamflow metrics published by Gudmundsson et al.  
3 (2019) for all reference gauges with Gini index and Apportionment Entropy added. Q is total discharge  
4 over the water year. CT50 is the center of timing calculated as the day of the water year at which 50% of  
5 flow has passed a gauge; CTW is the center of timing using the flow-weighted average day. SD is daily  
6 standard deviation of flow; CV is daily coefficient of variation; IQR is the interquartile range of daily  
7 flows. MIN and MAX are minimum and maximum daily values. P10, P50, and P90 refer to the respective  
8 daily flow percentiles. GINI is the Gini index. DOYMIN and DOYMAX are the day of the water year on  
9 which minimum and maximum flow occur, respectively. MIN7 and MAX7 are the minimum and  
10 maximum 7-day moving average, while DOYMIN7 and DOYMAX7 refer to the days on which these  
11 values occur. Monthly and daily AE are appropriation entropy calculated on monthly and daily data,  
12 respectively<sup>12</sup>.

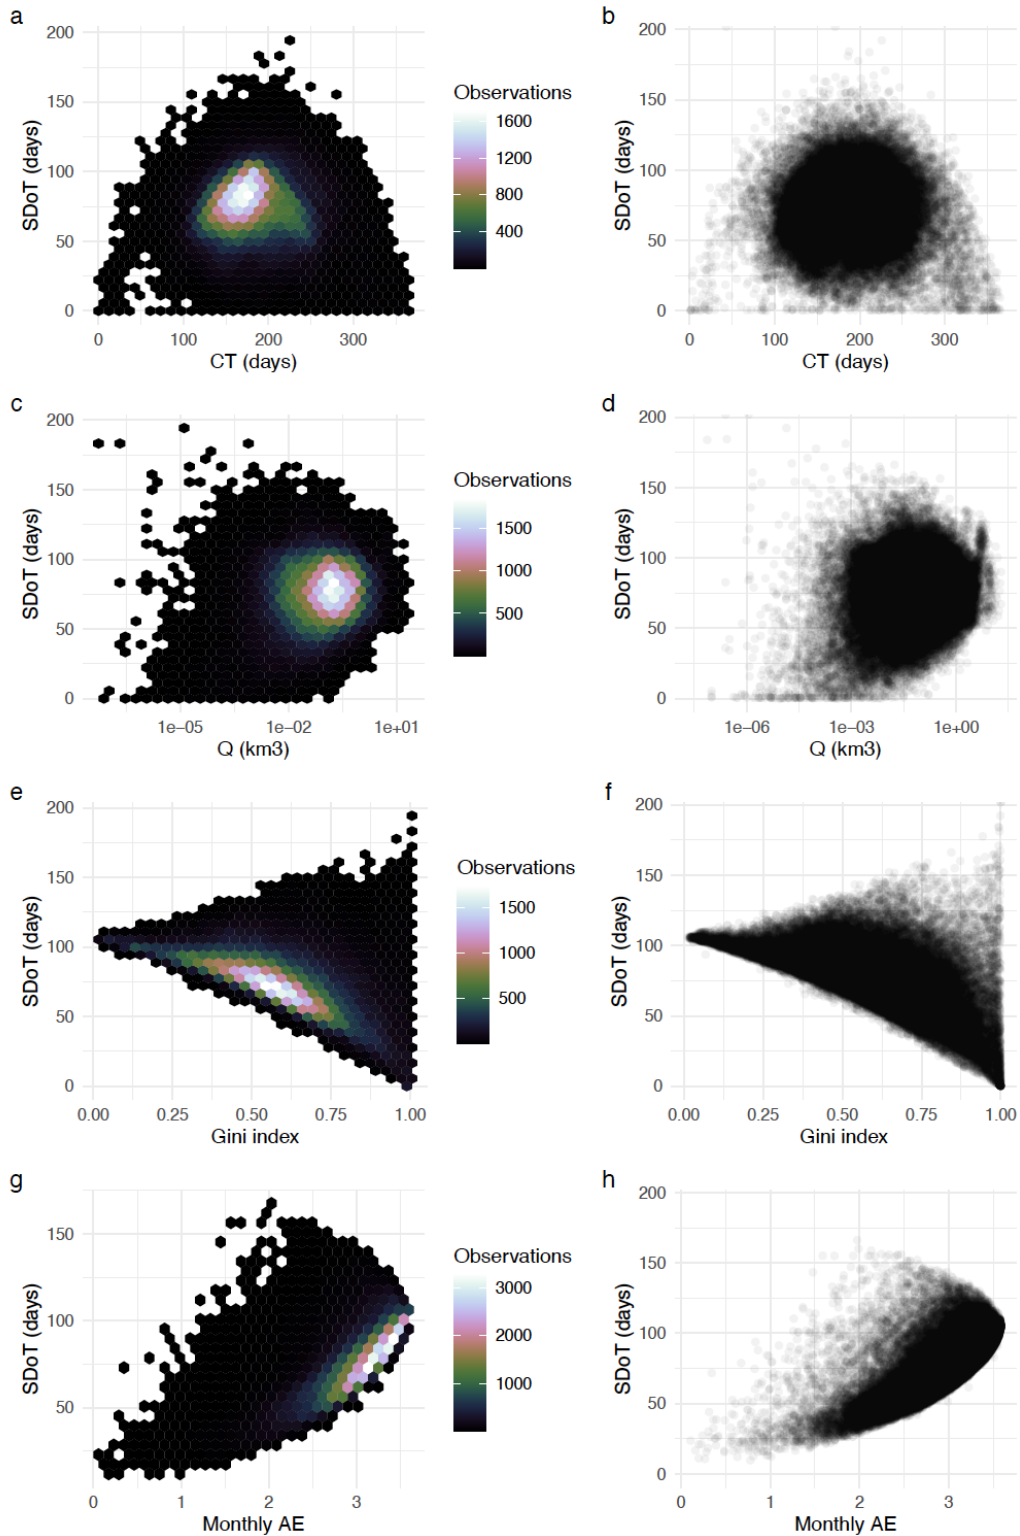

1  
2 **Figure S7.** Scatter plots showing global relationship between (a, b) CT and SDoT as filled hexagons and  
3 points, (c,d) Q and SDoT, and (e,f) SDoT and the Gini index. Left column shows 2-dimensional density  
4 plots (with fill indicating number of observations), and right column shows scatter plot.  
5

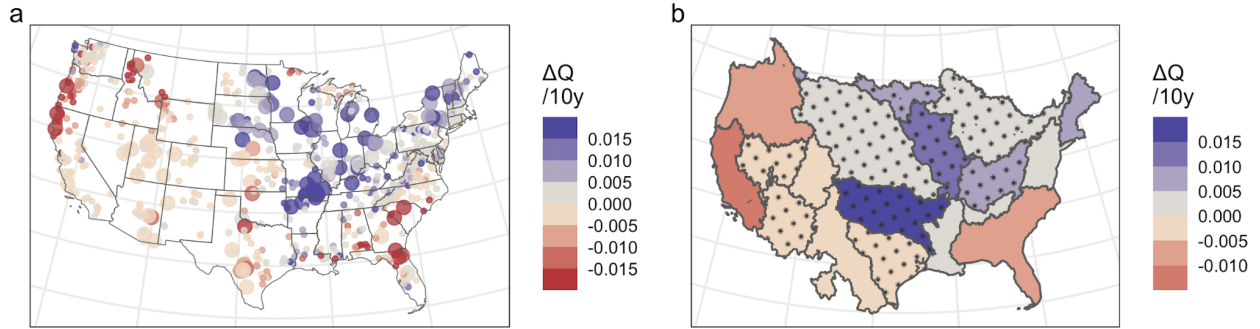

1  
2 **Figure S8.** As in Figure 2, but for Q instead of SDoT.  
3

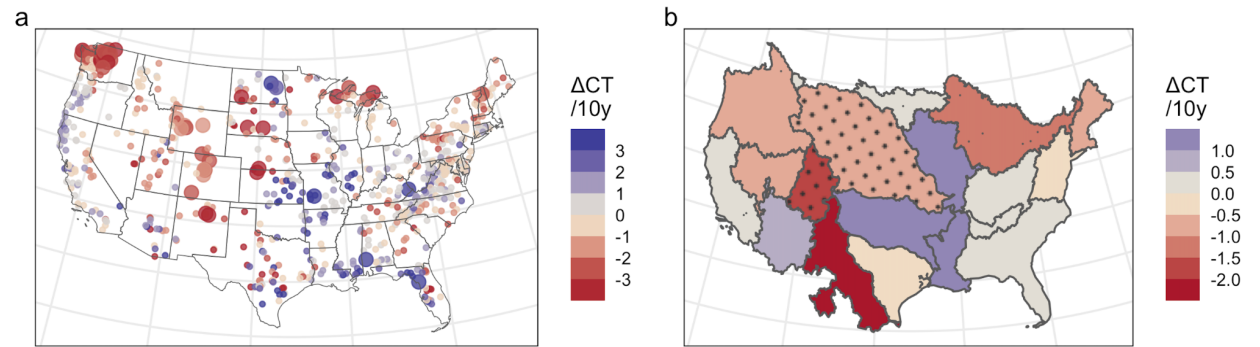

4  
5 **Figure S9.** As in Figure 2, but for CT instead of SDoT.

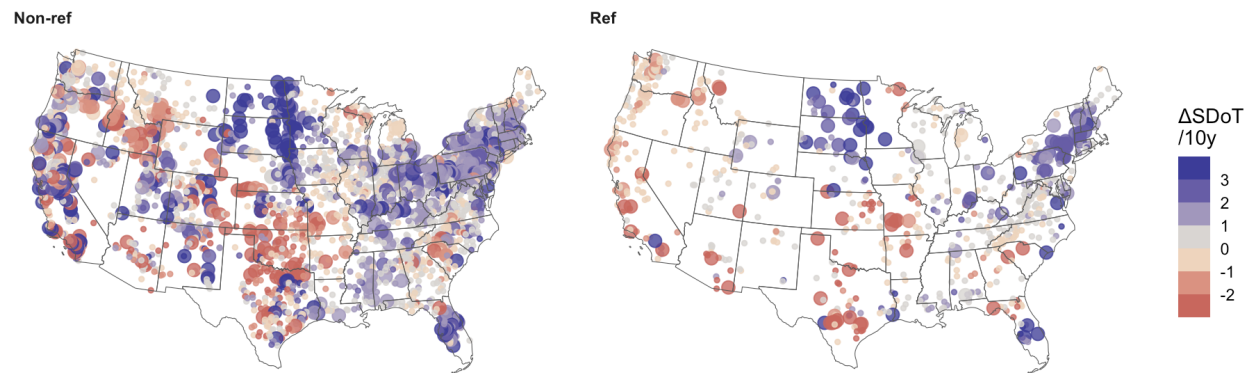

6  
7 **Figure S10.** Trends in SDoT in non-reference (left) and reference (right) gauges.  
8

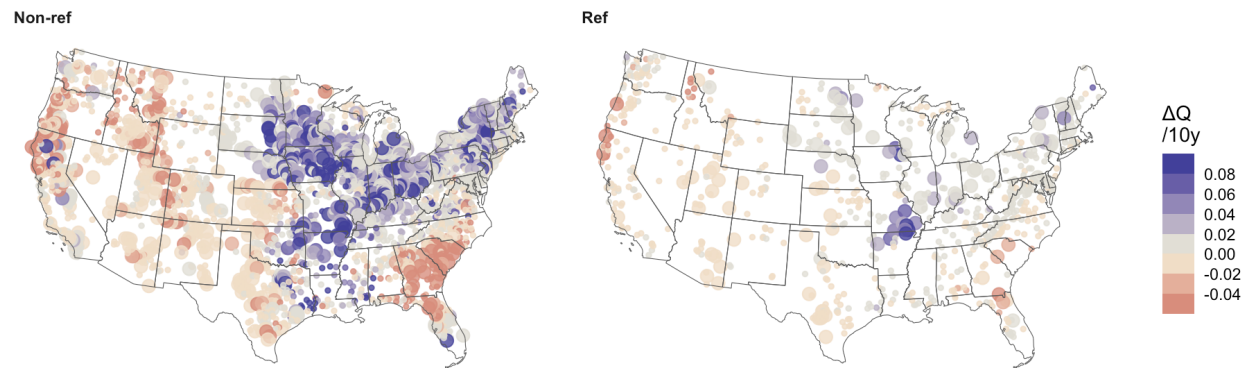

9  
10 **Figure S11.** Trends in Q in non-reference (left) and reference (right) gauges.

1

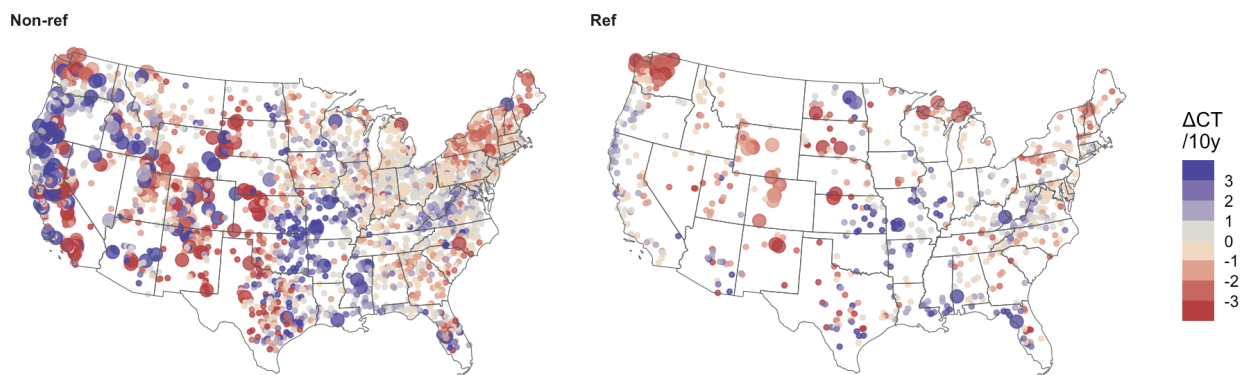

2

3

Figure S12. Trends in CT in non-reference (left) and reference (right) gauges.

4

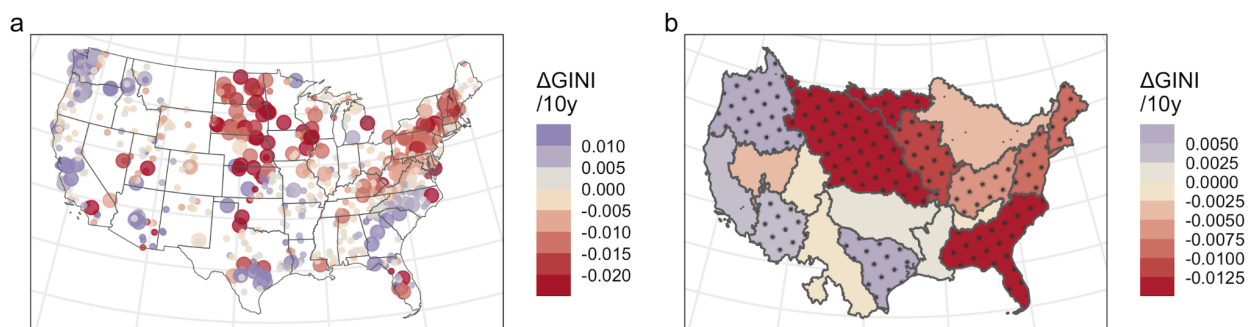

5

6

Figure S13. As in Figure 2, but for Gini instead of SDoT.

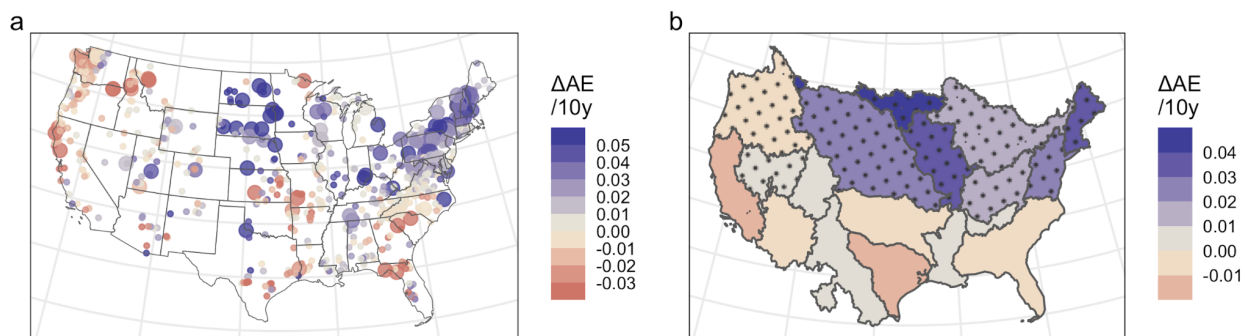

7

8

Figure S14. As in Figure 2, but for AE instead of SDoT.

9

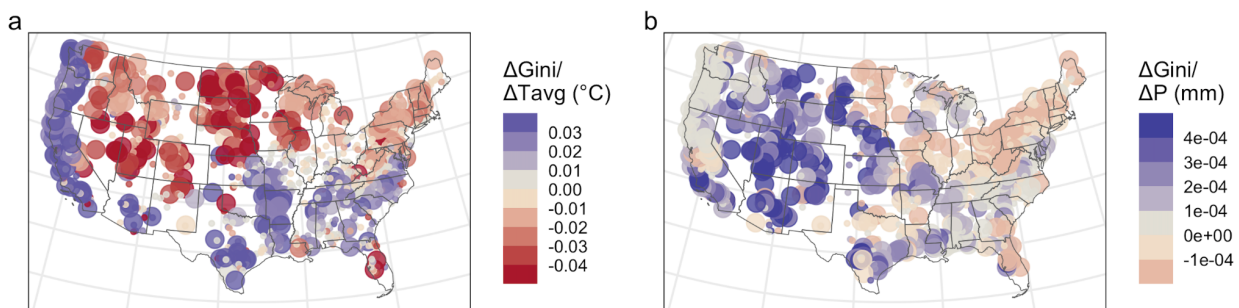

10

11

Figure S15. Sensitivity of annual Gini variability to temperature and precipitation, as in Figure 2.

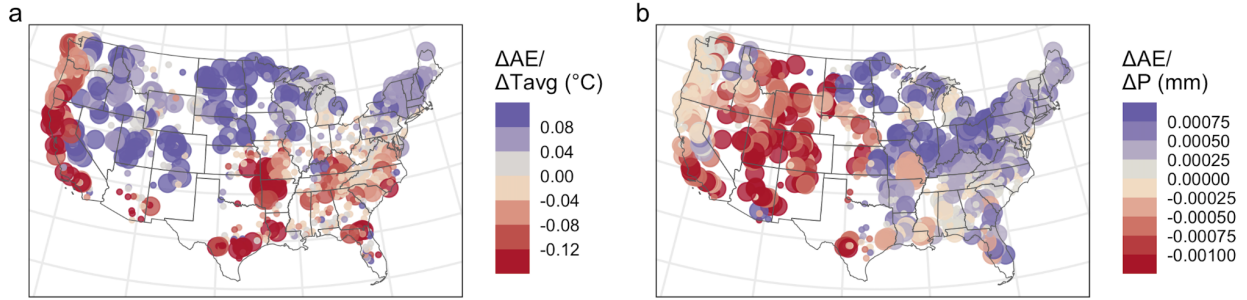

1  
2 **Figure S16.** Sensitivity of annual AE variability to temperature and precipitation, as in Figure 2.  
3

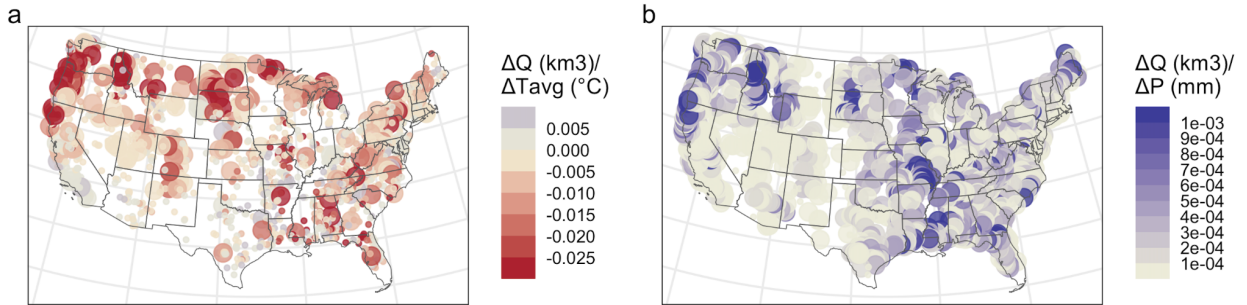

4  
5 **Figure S17.** Sensitivity of annual Q variability to temperature and precipitation, as in Figure 2.  
6

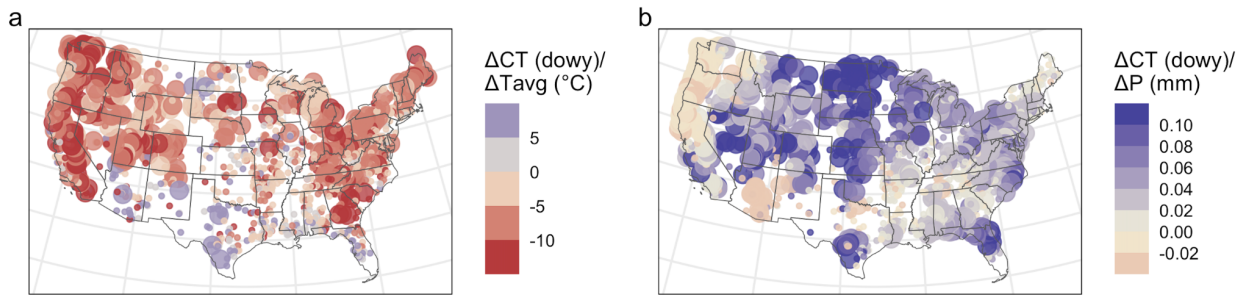

7  
8 **Figure S18.** Sensitivity of annual CT variability to temperature and precipitation, as in Figure 2.  
9

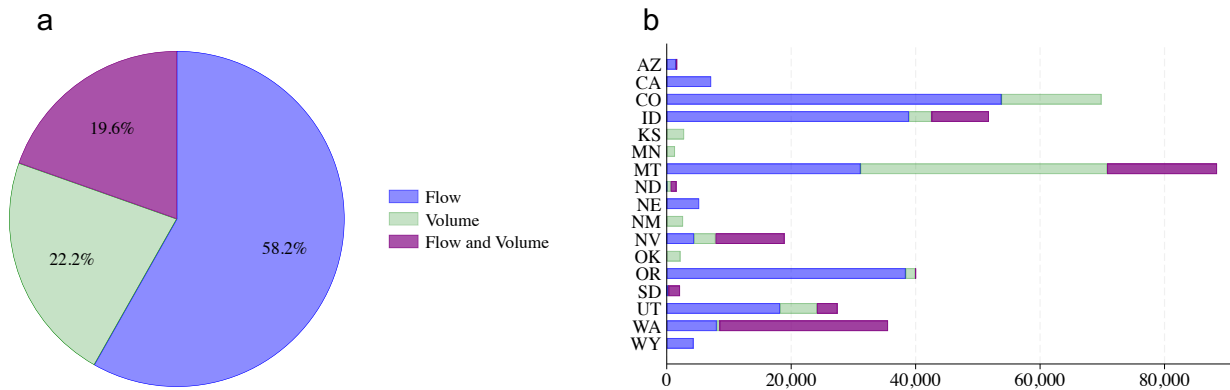

10  
11 **Figure S19** Distribution of demarcation units for surface water rights across the western states compiled  
12 from WestDAAT. N=361,555  
13

1

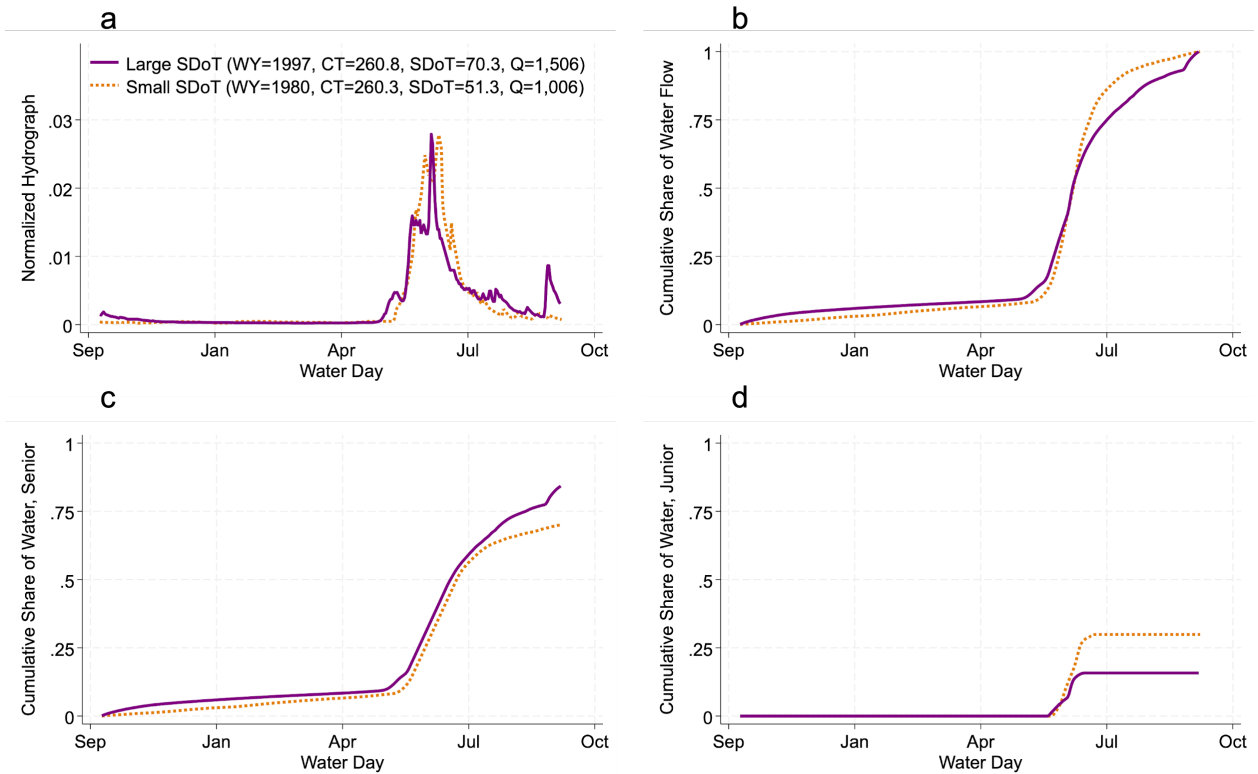

2

3 **Figure S20.** Shows normalized hydrographs as in Figure 3 but using real data from two years on  
 4 Cameron Pass (USGS gauge 06614800) with nearly identical center of timings but different SDoTs.  
 5 Senior water rights are provided the first 0.01 units of water each day in the simulation.

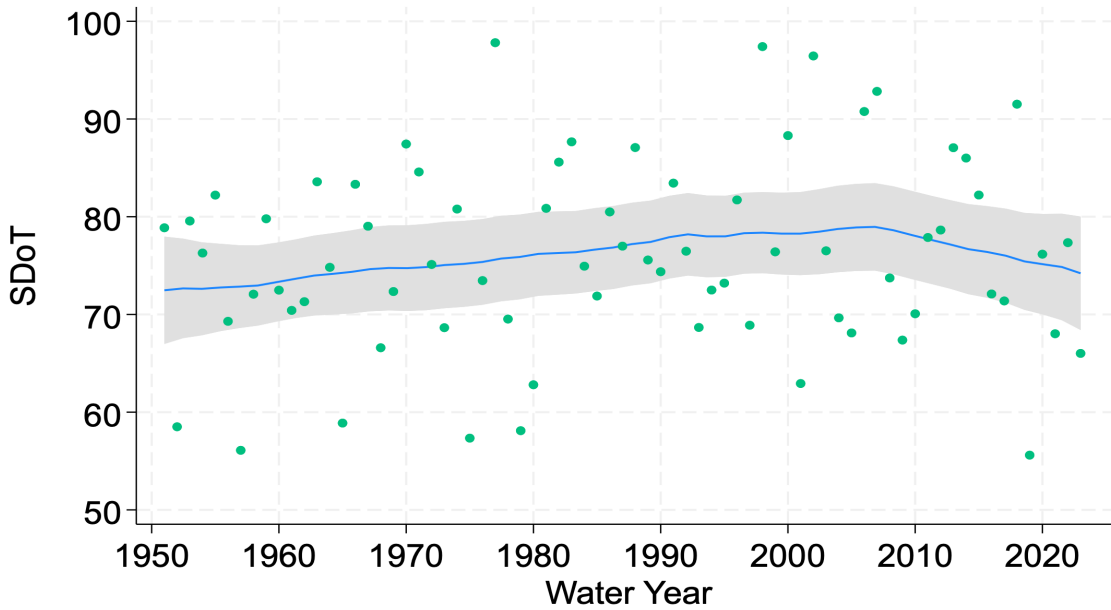

6

7 **Figure S21.** SDoT values for the Rio Grande, Colorado at the Del Norte gauge across time. Line is a local  
 8 polynomial smoothed line flexibly tracing out the trend.

1

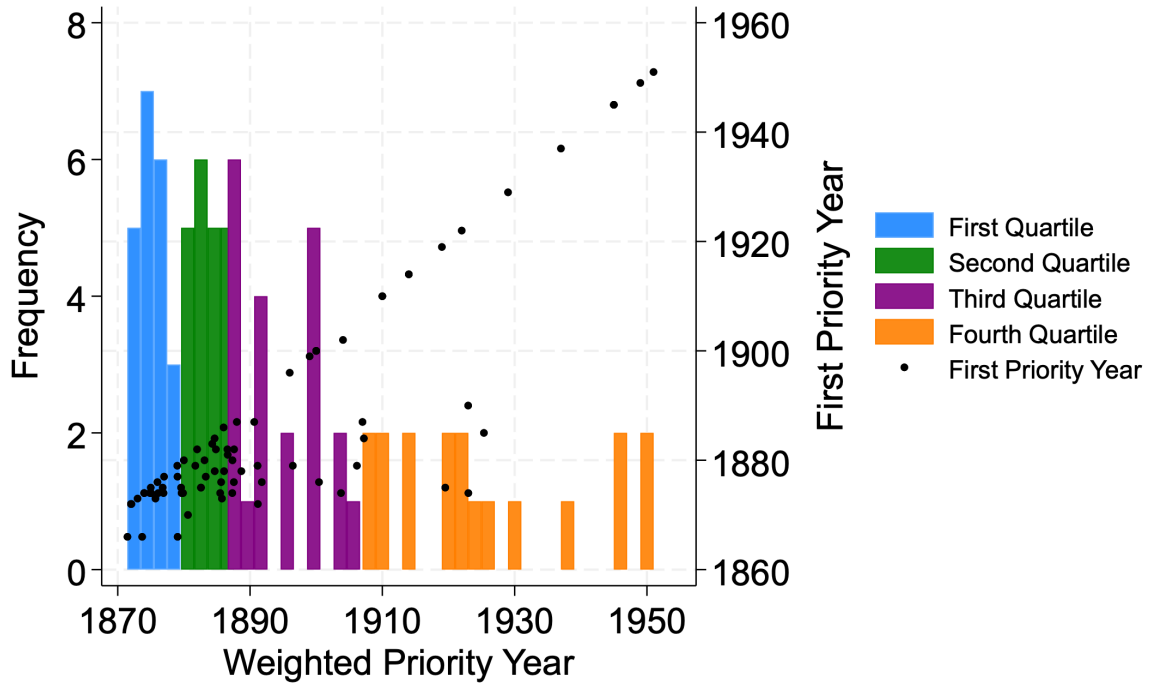

2  
3  
4  
5

**Figure S22.** Priority years of ditches on the Rio Grande, Colorado. Frequency is the number of ditches falling in each weighted priority year. Scatter points compare the weighted priority year to the ditch’s earliest priority year. Note that this graph excludes one ditch with a weighted priority year of 2000.

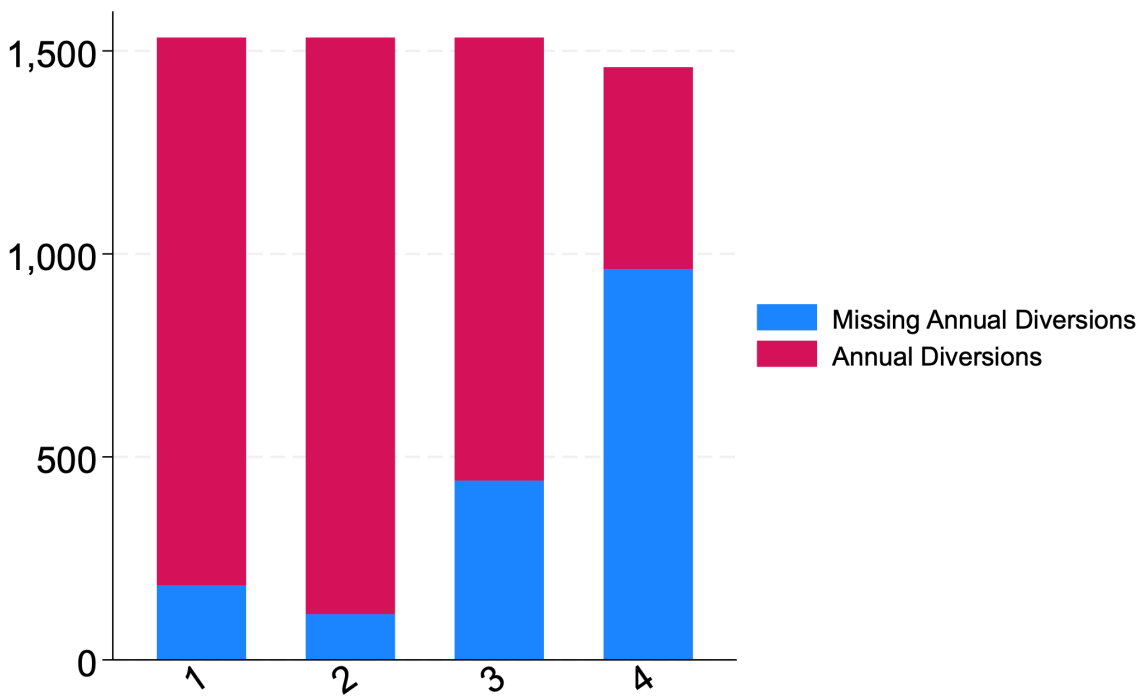

6  
7  
8

**Figure S23.** Missing diversion records by priority bin of ditches on the Rio Grande, Colorado.

1  
2

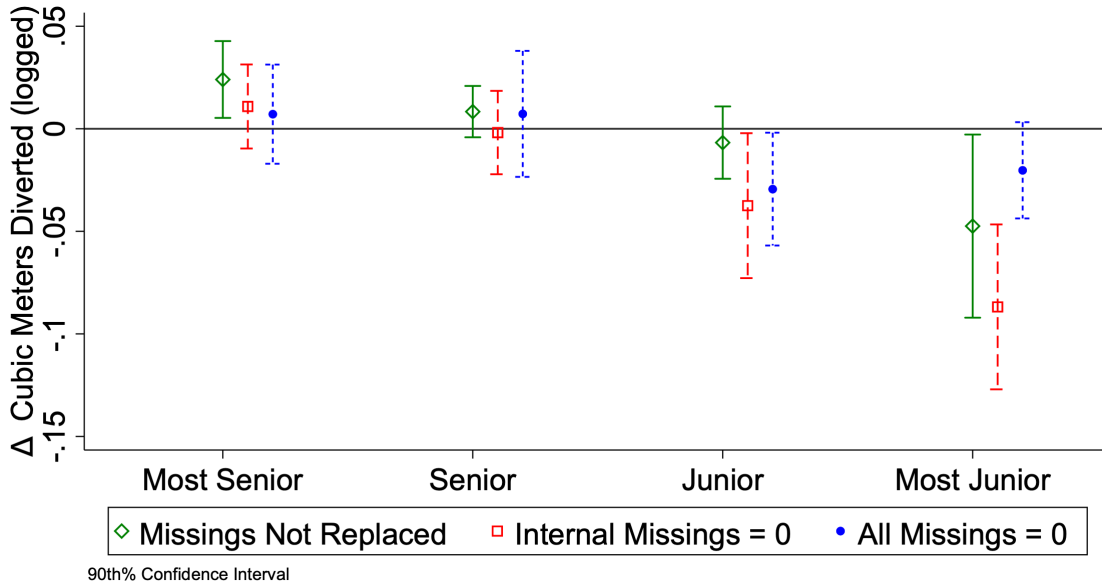

3  
4  
5  
6  
7  
8  
9

**Figure S24.** Point estimates of how much total annual diversions change due to a one day increase in SDoT by seniority quartiles. Three different regression results are presented for the alternative assumptions about missing diversion records. Each regression also includes Q, CT, and ditch fixed effects.

1  
2  
3  
4  
5  
  
6  
7

**Supplemental Tables (S1-S2)**

**Table S1.** Percent of reference gauges in the US with significant local trends ( $p < 0.05$ ) for each streamflow variable of interest.

| <b>Variable</b> | <b>Percent significant</b> | <b>Percent significant and positive</b> | <b>Percent significant and negative</b> |
|-----------------|----------------------------|-----------------------------------------|-----------------------------------------|
| Annual Q        | 15.7                       | 10.2                                    | 5.5                                     |
| CT              | 6.4                        | 0.8                                     | 5.6                                     |
| SDoT            | 17.1                       | 10.3                                    | 6.8                                     |
| Gini            | 26.6                       | 9.0                                     | 17.6                                    |
| AE              | 19.9                       | 15.1                                    | 4.8                                     |

1  
2  
3  
4  
5  
6  
7  
8  
9  
10  
11  
12

**Table S2.** Estimated relationship between SDoT and water right seniority on total diversions, Rio Grande, Colorado.

| $y=\ln(\text{diversions}+1)$               | (1)                   | (2)                          | (3)                   | (4)                   | (5)                          | (6)                 | (7)                  | (8)                          | (9)                  |
|--------------------------------------------|-----------------------|------------------------------|-----------------------|-----------------------|------------------------------|---------------------|----------------------|------------------------------|----------------------|
| Stream Dispersion                          | 0.0240**<br>(0.0114)  | 0.0109<br>(0.0125)           | 0.00713<br>(0.0147)   | 1.240**<br>(0.563)    | 0.352<br>(0.721)             | -0.170<br>(0.826)   | -2.936**<br>(1.416)  | 0.470<br>(2.418)             | 1.759<br>(2.846)     |
| Stream Dispersion x Priority<br>Quartile 1 | Omitted               | Omitted                      | Omitted               | Omitted               | Omitted                      | Omitted             | Omitted              | Omitted                      | Omitted              |
| Stream Dispersion x Priority<br>Quartile 2 | -0.0157<br>(0.0108)   | -0.0127<br>(0.0131)          | 0.000136<br>(0.0152)  | -1.229<br>(0.809)     | -0.979<br>(0.997)            | -0.489<br>(0.948)   | 4.402*<br>(2.412)    | 3.705<br>(3.074)             | 2.703<br>(2.903)     |
| Stream Dispersion x Priority<br>Quartile 3 | -0.0308**<br>(0.0136) | -0.0483**<br>(0.0214)        | -0.0365**<br>(0.0148) | -2.085**<br>(0.889)   | -2.744**<br>(1.368)          | -2.139**<br>(1.056) | 6.619**<br>(2.510)   | 7.503*<br>(3.922)            | 6.291*<br>(3.204)    |
| Stream Dispersion x Priority<br>Quartile 4 | -0.0715**<br>(0.0353) | -0.0977***<br>(0.0323)       | -0.0274<br>(0.0194)   | -4.721**<br>(2.307)   | -5.988***<br>(1.926)         | -2.090**<br>(0.989) | 15.27**<br>(6.301)   | 16.84***<br>(5.567)          | 6.214*<br>(3.170)    |
| ln(Q)                                      | 0.593***<br>(0.211)   | 0.899**<br>(0.341)           | 1.299***<br>(0.397)   | 0.562***<br>(0.188)   | 0.754**<br>(0.328)           | 1.157***<br>(0.400) | 0.486***<br>(0.160)  | 0.612*<br>(0.324)            | 1.020**<br>(0.405)   |
| CT                                         | 0.0148**<br>(0.00662) | 0.000230<br>(0.00843)        | -0.0135<br>(0.0113)   | 0.0122**<br>(0.00571) | -0.0000862<br>(0.00763)      | -0.0177<br>(0.0112) | 0.00909<br>(0.00608) | -0.00488<br>(0.00826)        | -0.0224*<br>(0.0121) |
| Constant                                   | 6.939*<br>(3.586)     | 6.693<br>(5.192)             | -0.184<br>(5.350)     | 8.813***<br>(3.192)   | 11.50**<br>(5.362)           | 5.832<br>(6.420)    | 8.863***<br>(2.546)  | 7.003<br>(4.350)             | 1.853<br>(4.799)     |
| Observations                               | 4355                  | 4666                         | 6059                  | 4355                  | 4666                         | 6059                | 4355                 | 4666                         | 6059                 |
| Adjusted R-squared                         | 0.634                 | 0.656                        | 0.806                 | 0.635                 | 0.656                        | 0.806               | 0.638                | 0.657                        | 0.807                |
| Dispersion Metric                          | SDoT                  | SDoT                         | SDoT                  | AE                    | AE                           | AE                  | Gini                 | Gini                         | Gini                 |
| Missing Data                               | As is                 | Zero within<br>Ditch records | Zeros                 | As is                 | Zero within<br>Ditch records | Zeros               | As is                | Zero within<br>Ditch records | Zeros                |

Note: Coefficients from estimating equation S4. All regressions include ditch fixed effects. Columns (1)-(3) measures stream dispersion with our preferred metric, SDoT. Column (1) treated missing diversions as missing. Column (2) treats missing records between non-zero diversion records as zeros, but missing outside of that. Column (3) treats all missing records as zero. Columns (4)-(6) repeat using AE to measure stream dispersion and Columns (7)-(9) uses the Gini coefficient. Standard errors, clustered by WDID and water year, in parentheses. \* p<0.1 \*\* p<0.05 \*\*\* p<0.01

1 **Supplemental References**

- 2 1. Falcone, J. A. GAGES-II: Geospatial Attributes of Gages for Evaluating Streamflow. GAGES-II:  
3 Geospatial Attributes of Gages for Evaluating Streamflow  
4 <http://pubs.er.usgs.gov/publication/70046617> (2011) doi:10.3133/70046617.  
5 2. Vose, R. S. et al. NOAA Monthly U.S. Climate Gridded Dataset (NCLimGrid), Version 1.  
6 <https://doi.org/10.7289/V5SX6B56> (2014).  
7 3. Water Data Exchange (WaDE) Program. Western States Water Data Access and Analysis Tool  
8 (WestDAAT). (2025).  
9 4. Colorado Division of Water Resources. DWR Water Right - Net Amounts. (2025).  
10 5. Wasko, C., Nathan, R. & Peel, M. C. Trends in Global Flood and Streamflow Timing Based on Local  
11 Water Year. *Water Resour. Res.* **56**, e2020WR027233 (2020).  
12 6. Han, J. et al. Streamflow seasonality in a snow-dwindling world. *Nature* **629**, 1075–1081 (2024).  
13 7. American Meteorological Society. Water Year. Glossary of Meteorology (2024).  
14 8. Ceriani, L. & Verme, P. The origins of the Gini index: extracts from *Variabilità e Mutabilità* (1912)  
15 by Corrado Gini. *J. Econ. Inequal.* **10**, 421–443 (2012).  
16 9. Gudmundsson, L., Do, H. X., Leonard, M. & Westra, S. The Global Streamflow Indices and  
17 Metadata Archive (GSIM) – Part 2: Quality control, time-series indices and homogeneity assessment.  
18 *Earth Syst. Sci. Data* **10**, 787–804 (2018).  
19 10. Sen, P. K. Estimates of the Regression Coefficient Based on Kendall’s Tau. *J. Am. Stat. Assoc.* **63**,  
20 1379–1389 (1968).  
21 11. Livezey, R. E. & Chen, W. Y. Statistical Field Significance and its Determination by Monte Carlo  
22 Techniques. *Mon. Weather Rev.* **111**, 46–59 (1983).  
23 12. Wang, H. et al. Anthropogenic climate change has influenced global river flow seasonality. *Science*  
24 **383**, 1009–1014 (2024).  
25

26

27

28
